# Supplementary material for: Dentin Bonding and SEM Analysis of a New Experimental Universal Adhesive System Containing a Dendrimer
Source: PubMed Central journal article supplement (PMC7077672; doi:10.3390/polym12020461), 2020-02-17
Supplement: polymers-12-00461-s001.pdf [file polymers-12-00461-s001.pdf]

# Supplementary Information: Dentin Bonding and SEM Analysis of a New Experimental Universal Adhesive System Containing a Dendrimer

Joana Vasconcelos e Cruz <sup>1,2</sup>, Mário Polido <sup>2,3</sup>, José Brito <sup>2,3</sup> and Luisa L. Gonçalves <sup>2,3,\*</sup>

<sup>1</sup> Instituto de Ciências Biomédicas de Abel Salazar (ICBAS), Universidade do Porto, Rua de Jorge Viterbo Ferreira 228, 4050-313 Porto, Portugal; joanavcruz@gmail.com

<sup>2</sup> Instituto Universitário Egas Moniz (IUEM), Campus Universitário, Quinta da Granja, Monte de Caparica, 2829-511 Caparica, Portugal; mpolido@egasmoniz.edu.pt (M.P.); britojaa@hotmail.com (J.B.)

<sup>3</sup> Centro de Investigação Interdisciplinar Egas Moniz (CiiEM), Campus Universitário, Quinta da Granja, Monte de Caparica, 2829-511 Caparica, Portugal

\* Correspondence: lgoncalves@egasmoniz.edu.pt

Received: 26 January 2020; Accepted: 13 February 2020; Published: date

In order to assess whether there is an association between the type of fracture (adhesive (A) or cohesive (C)) and the type of adhesive (SBU, FUT, AE1 and AE2), 2 X 4 contingency tables and the chi-square test were used. Table 4 shows the prevalence of each type of fracture per adhesive. In view of such data, the chi-square test produced a significant result ( $p = 0.001$ ) which shows that there is an association between type of fracture and adhesive. Consequently, 2 x 2 contingency tables and chi-square test with Bonferroni corrections were used to compare the prevalence of adhesive fractures between any two adhesives, with the following results:

-The prevalence of adhesive fractures in SBU (77.5%) is significantly lower ( $p < 0.001$ ) than in 296 AE2 (91.9%), therefore the prevalence of cohesive fractures in SBU (22.5%) is significantly higher 297 than in AE2 (8.1%). 298

- Moreover, the prevalence of adhesive fractures in AE1 (76.9%) is significantly lower ( $p = 0.001$ ) 299 than in AE2 (91.9%), which means that the prevalence of cohesive fractures in AE1 (23.1%) is 300 significantly higher than in AE2 (8.1%).

**Table S1.** Cross tabulation with the prevalence of each type of fracture per adhesive.

|           |                                   | Adhesives |        |        |        | Total  |
|-----------|-----------------------------------|-----------|--------|--------|--------|--------|
|           |                                   | SBU       | FUT    | AE1    | AE2    |        |
| Fractures | A<br>(adhesive) % within adhesive | 77.5%     | 86.1%  | 76.9%  | 91.9%  | 81.8%  |
|           | C<br>(cohesive) % within adhesive | 22.5%     | 13.9%  | 23.1%  | 8.1%   | 18.2%  |
| Total     | % within adhesive                 | 100.0%    | 100.0% | 100.0% | 100.0% | 100.0% |
